# Supplementary material for: Direct Powder Extrusion of Paracetamol Loaded Mixtures for 3D Printed Pharmaceutics for Personalized Medicine via Low Temperature Thermal Processing
Source: MDPI journal article supplement (doi:10.3390/pharmaceutics13060907), 2021-06-19
Supplement: s1 [file s1]

# Supplementary Materials: Direct Powder Extrusion of Paracetamol Loaded Mixtures for 3D Printed Pharmaceuticals for Personalized Medicine via Low Temperature Thermal Processing

Xabier Mendibil, Gaizka Tena, Alaine Duque, Nerea Uranga, Miguel Ángel Campanero and Jesús Alonso

**Table S1.** Percentual mass losses of the individual constituents attributable to the moisture.

| Mass Loss   |          |
|-------------|----------|
| Material    | Loss [%] |
| Guar Gum    | 6        |
| Starch      | 10       |
| Paracetamol | 0        |
| HPC         | 0        |

**Table S2.** Recovery percentages of each API containing mixture at different Guar gum content.

| Guar Gum 0%wt |          |    |    | Guar Gum 5%wt |          |    |    | Guar Gum 10%wt |          |    |    |
|---------------|----------|----|----|---------------|----------|----|----|----------------|----------|----|----|
| Sample        | Mean [%] | SD | CV | Sample        | Mean [%] | SD | CV | Sample         | Mean [%] | SD | CV |
| F05702500A    | 103      | 2  | 2  | FG05652505A   | 104      | 2  | 3  | FG05602510A    | 86       | 9  | 5  |
| F20552500A    | 98       | 5  | 3  | FG20502505A   | 96       | 2  | 5  | FG20452510A    | 84       | 1  | 11 |
| F35402500A    | 80       | 9  | 10 | FG35352505A   | 79       | 5  | 6  | FG35302510A    | 81       | 6  | 2  |
| F50252500A    | 87       | 4  | 4  | FG50202505A   | 96       | 7  | 7  | FG50152510A    | 72       | 8  | 11 |

**Table S3.** Release curve of extruded mixtures containing 5% wt of Guar gum and different proportions of paracetamol and commercial acetamol tablet at different sampling times.

| FG05702505A |          |    |    | FG20552505A |          |    |    | FG35402505A |          |    |    | FG50252505A |          |    |    |
|-------------|----------|----|----|-------------|----------|----|----|-------------|----------|----|----|-------------|----------|----|----|
| Time [min]  | Mean [%] | SD | CV | Time [min]  | Mean [%] | SD | CV | Time [min]  | Mean [%] | SD | CV | Time [min]  | Mean [%] | SD | CV |
| 0           | 5        | 1  | 29 | 0           | 3        | 1  | 22 | 0           | 3        | 1  | 26 | 0           | 2        | 0  | 15 |
| 5           | 23       | 0  | 2  | 5           | 21       | 1  | 2  | 5           | 19       | 2  | 12 | 5           | 18       | 2  | 9  |
| 10          | 37       | 1  | 3  | 10          | 34       | 2  | 3  | 10          | 35       | 4  | 11 | 10          | 30       | 1  | 2  |
| 15          | 49       | 3  | 5  | 15          | 46       | 3  | 4  | 15          | 44       | 5  | 11 | 15          | 40       | 4  | 4  |
| 30          | 83       | 6  | 7  | 30          | 77       | 6  | 5  | 30          | 75       | 5  | 5  | 30          | 67       | 2  | 7  |
| 60          | 109      | 1  | 1  | 60          | 102      | 1  | 5  | 60          | 104      | 1  | 4  | 60          | 95       | 3  | 7  |

**Table S4.** Release curve of commercial paracetamol tablet at different sampling times.

| Paracetamol |          |    |    |
|-------------|----------|----|----|
| Time [min]  | Mean [%] | SD | CV |
| 0           | 1        | 1  | 48 |
| 5           | 78       | 8  | 10 |
| 10          | 98       | 1  | 1  |
| 15          | 98       | 1  | 1  |
| 30          | 99       | 1  | 0  |

**Table S5.** Recovery percentages of samples containing 5% of Guar gum tested in fresh condition and stored for 6 weeks at room temperature.

| Sample      | Fresh Conditions |    | Aged Conditions |    |
|-------------|------------------|----|-----------------|----|
|             | Mean [%]         | SD | Mean [%]        | SD |
| FG05702505A | 88               | 3  | 80              | 1  |
| FG20552505A | 90               | 0  | 73              | 2  |
| FG35402505A | 93               | 2  | 74              | 3  |
| FG50252505A | 98               | 2  | 74              | 3  |

**Table S6.** Recovery percentages of preliminary tests with water quantity proportional to excipient amount instead to starch amount.

| Sample     | Mean [%] | SD |
|------------|----------|----|
| FG05702503 | 98       | 3  |
| FG20552503 | 96       | 4  |
| FG35402503 | N/A      | -  |
| FG50252503 | N/A      | -  |

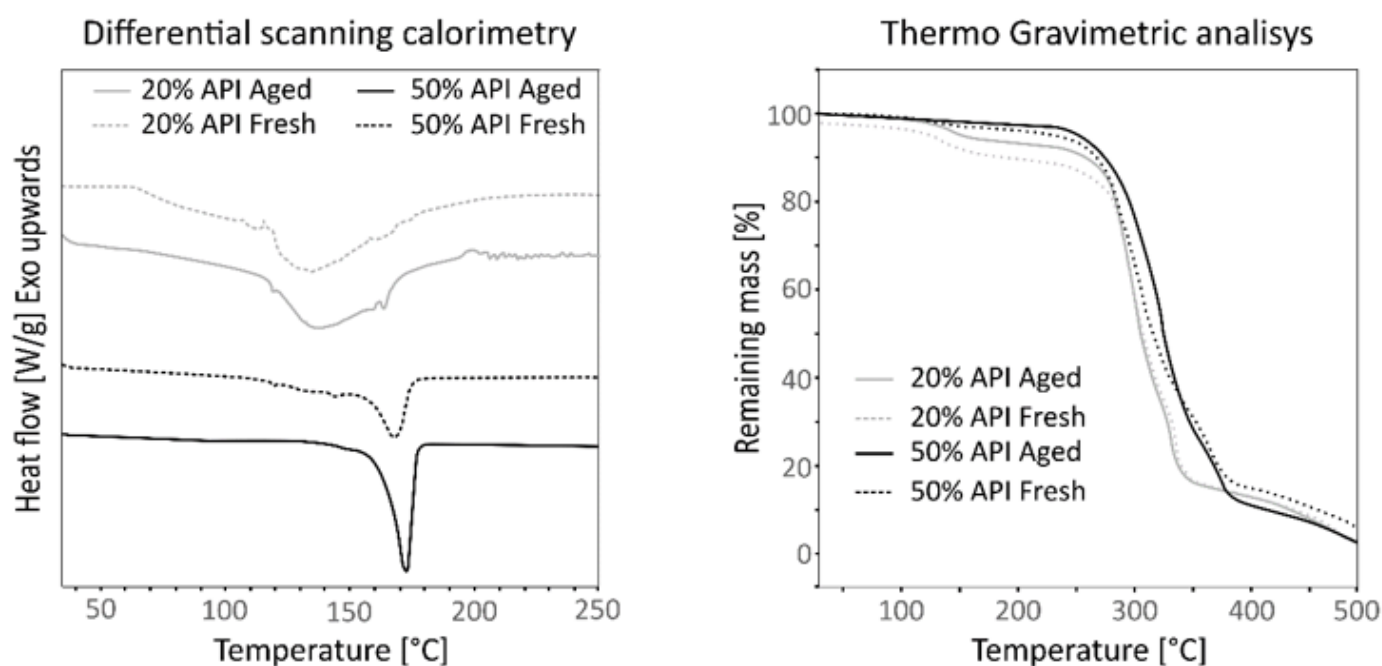**Figure S1.** Differential scanning calorimetry (left panel) and thermogravimetric analysis (right panel) of samples containing 5% wt of Guar gum and 20% wt (grey) and 50% wt (black) of paracetamol in freshly extruded condition (dashed line) and in aged for 6 weeks condition (continuous line).

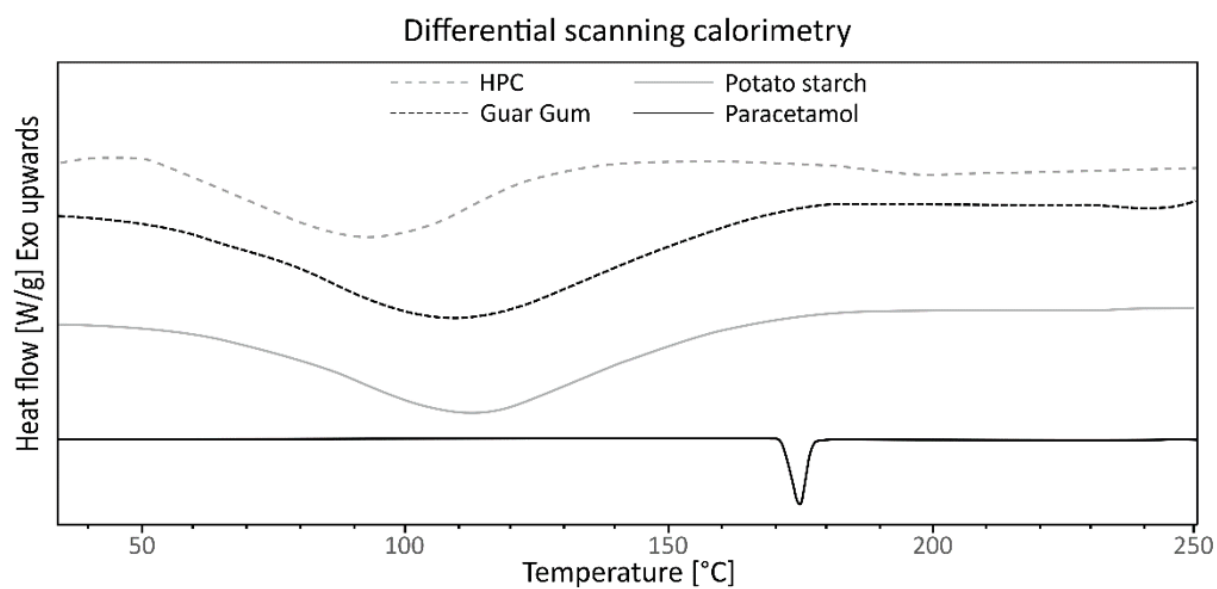

**Figure S2.** Differential scanning calorimetry of all the constituents of the mixture. HPC (dashed grey), Guar gum (dashed black), potato starch (continuous grey) and paracetamol (continuous black).
